# Supplementary material for: Repressed Blautia-acetate immunological axis underlies breast cancer progression promoted by chronic stress
Source: PubMed Central journal article supplement (PMC10547687; doi:10.1038/s41467-023-41817-2), 2023-10-03
Supplement: 41467_2023_41817_MOESM1_ESM.pdf [file 41467_2023_41817_MOESM1_ESM.pdf]

***Repressed Blautia-acetate immunological axis underlies breast cancer progression promoted by chronic stress***

Ling Ye<sup>1, #</sup>, Yuanlong Hou<sup>2, 3 #</sup>, Wanyu Hu<sup>1, #</sup>, Hongmei Wang<sup>4</sup>, Ruopeng Yang<sup>1</sup>, Qihan Zhang<sup>5</sup>, Qiaoli Feng<sup>5</sup>, Xiao Zheng<sup>2</sup>, Guangyu Yao<sup>5, \*</sup>, Haiping Hao<sup>2, \*</sup>

<sup>1</sup>NMPA Key Laboratory for Research and Evaluation of Drug Metabolism, Guangdong Provincial Key Laboratory of New Drug Screening, School of Pharmaceutical Sciences, Southern Medical University, Guangzhou, 510515, China.

<sup>2</sup>State Key Laboratory of Natural Medicines, Jiangsu Province Key Laboratory of Drug Metabolism, China Pharmaceutical University, Nanjing, 210009, China.

<sup>3</sup>Department of Pharmacy, Shenzhen Luohu People's Hospital, Shenzhen, 518000, China.

<sup>4</sup>Department of Radiation Oncology, Nanfang Hospital, Southern Medical University, Guangzhou, 510515, China

<sup>5</sup>Breast Center, Department of General Surgery, Nanfang Hospital, Southern Medical University, Guangzhou, 510515, China.

# These authors contribute equally to this work.

\* Correspondence: [haipinghao@cpu.edu.cn](mailto:haipinghao@cpu.edu.cn) (Haiping Hao)

[yaogy@smu.edu.cn](mailto:yaogy@smu.edu.cn) (Guangyu Yao)

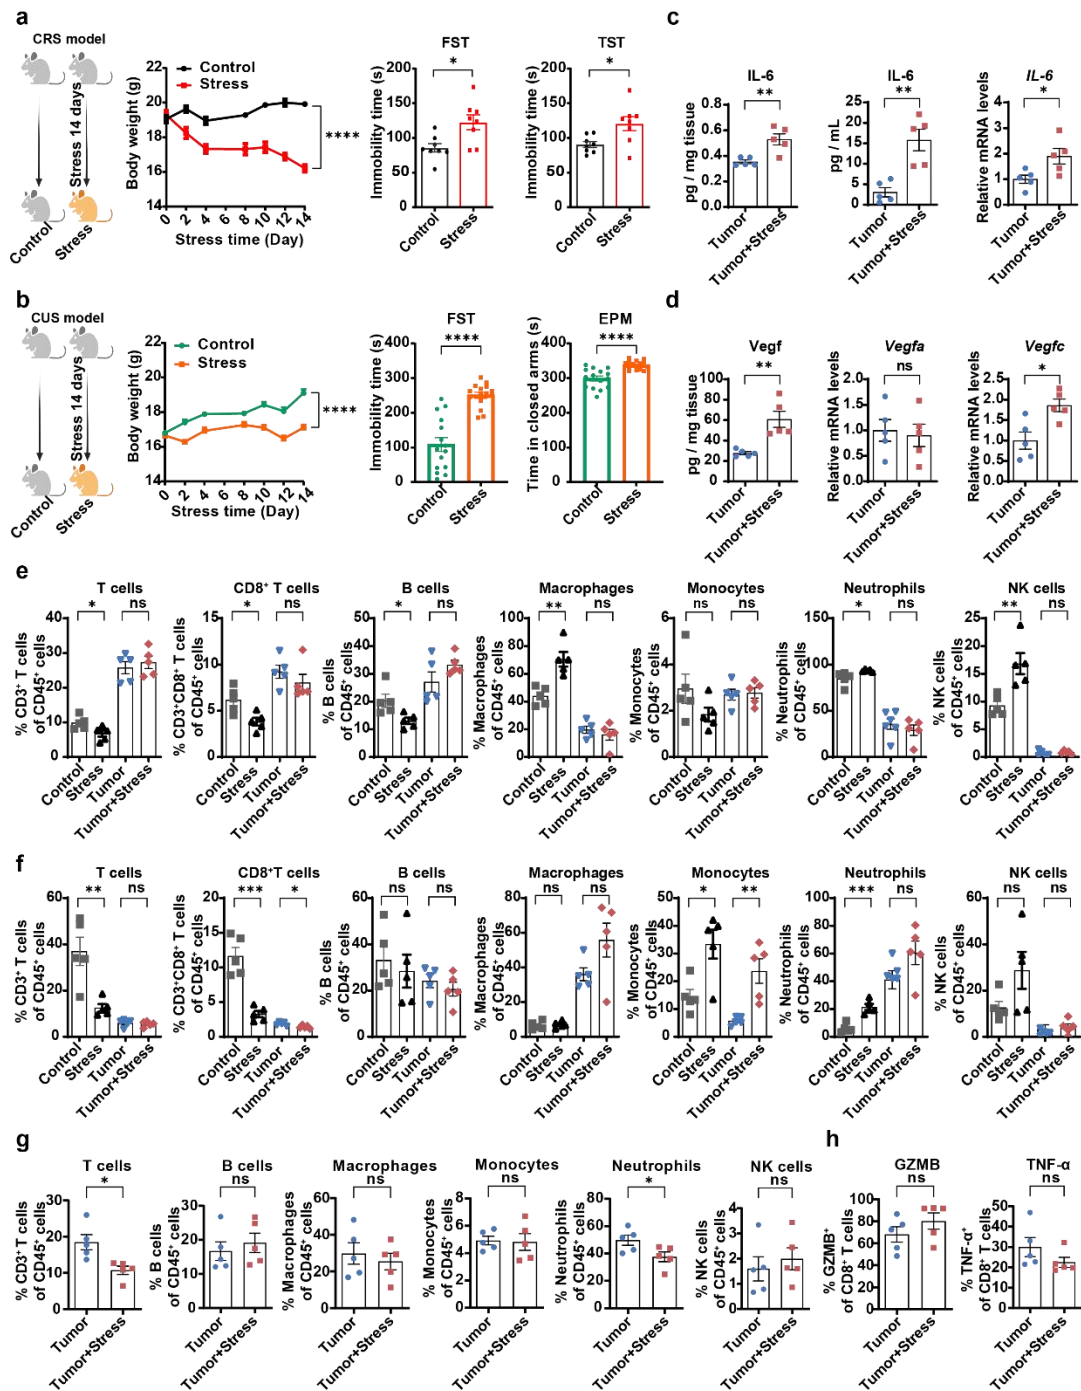

**Supplementary Fig. 1. Chronic stress promotes breast cancer progression in mice.**

(a) Effects of chronic restraint stress (CRS) on body weight and immobility time of mice in the forced swim test (FST) and tail suspension test (TST), respectively (Body weight: n=11 per group, FST and TST: n=8 per group). Created with BioRender.com.

(b) Effects of chronic unpredictable stress (CUS) on body weight and immobility time of mice in the FST and time in closed arms in elevated plus maze (EPM) test, respectively (Body weight: n=18 per group, FST and EPM: n=15 per group). Created

with BioRender.com. (c, d) Levels of IL-6 and Vegf in the serum and tumor tissue of CRS tumor mice (n=5 per group). (e, f) Abundance of immune cells in the blood and spleen of CRS mice (n=5 per group). (g) Tumor-infiltrated immune cells in CRS mice (n=5 per group). (h) Abundance of GZMB and TNF- $\alpha$  in tumor-infiltrated CD8<sup>+</sup> T cells in CRS mice (n=5 per group). Data were presented as mean  $\pm$  SEM. Statistical analysis of body weight was determined using two-way ANOVA followed by Sidak's multiple comparison test and the other data were determined using unpaired two-tailed Student's t-test. \* $p < 0.05$ ; \*\* $p < 0.01$ ; \*\*\* $p < 0.001$ ; \*\*\*\* $p < 0.0001$ ; ns, not significant. Source data and exact  $p$  values are provided in the Source data file.

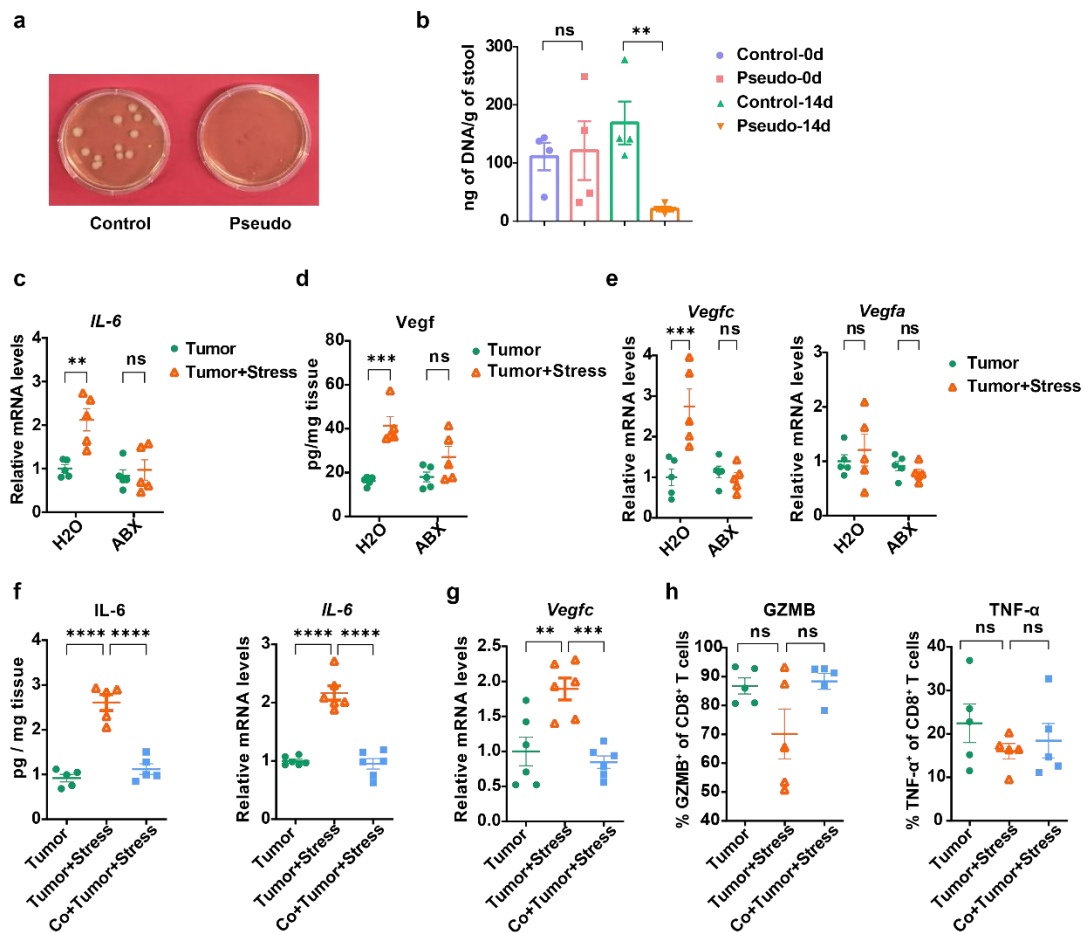

**Supplementary Fig. 2. Chronic stress alters tumoral inflammatory cytokines involving gut microbiota.** (a) Antibiotic-induced microbiome depletion illustrated through sample stool cultures of control and pseudo mice. (b) DNA extraction performed on stool samples from both control mice and pseudo mice (n=4 per group).

(c) Expression of *IL-6* in tumor tissue of non-stressed and stressed tumor groups with or without the antibiotic cocktail (ABX) treatment (n=5 per group). (d) Content of *Vegf* in the tumor tissue of non-stressed and stressed tumor groups with or without ABX treatment (n=5 per group). (e) Expression levels of *Vegfc* and *Vegfa* in the tumor tissue of non-stressed and stressed tumor groups with or without ABX treatment (n=5 per group). (f) Content (n=5 per group) and expression level (n=6 per group) of *IL-6* in the tumor tissue of different groups in the co-housing experiments. (g) Expression level of *Vegfc* in the tumor tissue of different groups in the co-housing experiments (n=6 per group). (h) *GZMB* and *TNF- $\alpha$*  abundance of tumor-infiltrated *CD8<sup>+</sup>* T cells in the co-housing experiments (n=5 per group). Data were presented as mean  $\pm$  SEM. Statistical significance was determined by (b) unpaired two-tailed Student's t-test, (c-e) two-way ANOVA followed by Sidak's multiple comparison test, or (f-h) one-way ANOVA followed by Tukey's multiple comparisons test. \* $p < 0.05$ ; \*\* $p < 0.01$ ; \*\*\* $p < 0.001$ ; \*\*\*\* $p < 0.0001$ ; ns, not significant. Source data and exact  $p$  values are provided in the Source data file.

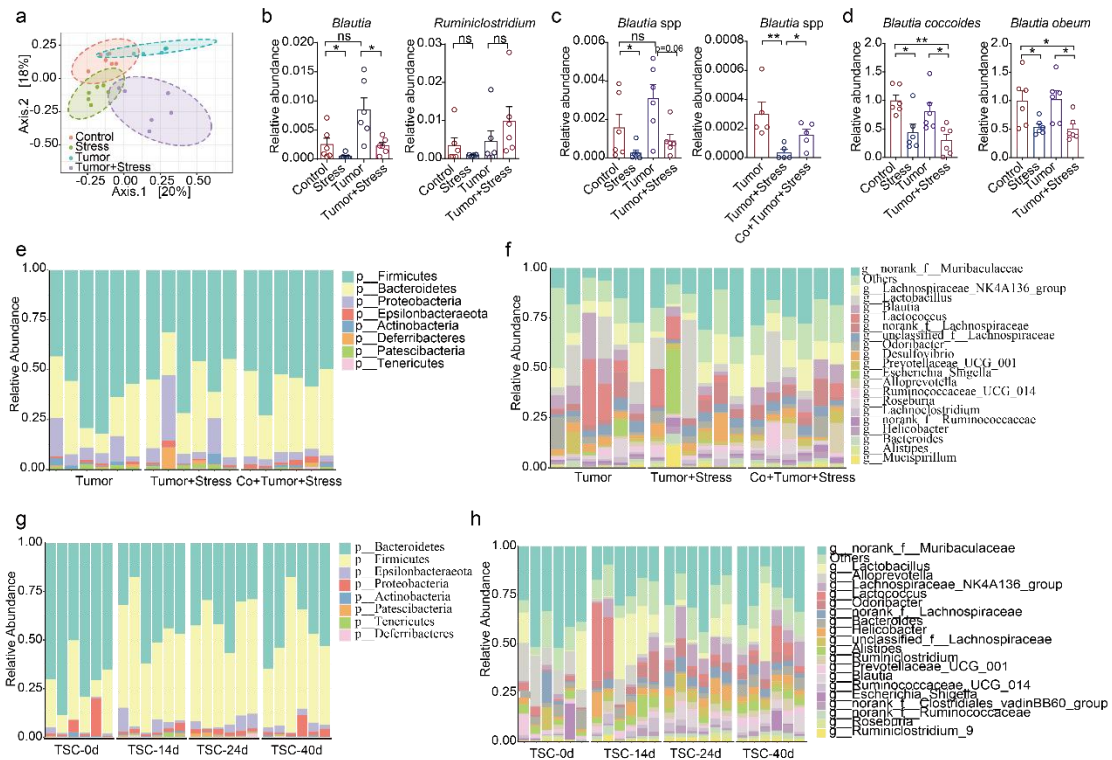

**Supplementary Fig. 3. Chronic stress remodels the composition of the gut microbiota.** (a) Principal Coordinate Analysis (PCoA) plot of the cecal microbial composition of non-stressed and stressed mice with or without breast cancer at the end of 40 days. The community distance is based on the Bray-Curtis dissimilarity metrics of relative abundance determined by 16S rRNA sequencing. Each symbol represents the data of an individual mouse (n=6 per group). (b) Relative abundance of *Blautia* and *Ruminiclostridium* at the genus level in the cecal sample by 16S rRNA sequencing (n=6 per group). (c) Relative abundance of *Blautia* spp in the cecal sample by 16S rRNA sequencing (Control, Stress, Tumor, Tumor+Stress group: n=6, Tumor, Tumor+Stress, Co+Tumor+Stress group: n=5). (d) Analysis of gene expression representative of *Blautia coccoides* and *Blautia obeum* in fecal samples from CUS mice by qPCR. (e, f) Average relative abundance of representative phylum (e) and genus (f) in the gut microbiota from the co-housing experiment by 16S rRNA sequencing (n=6 per group). (g, h) Time-dependent changes in relative abundance at the phylum (g) and genus (h) level from the fecal microbiota of co-housed mice by 16S rRNA sequencing (n=6 per group). Data were presented as mean  $\pm$  SEM. \* $p$  < 0.05 by the Wilcoxon rank-sum test. "ns" means no significant difference. Source data

and exact  $p$  values are provided in the Source data file.

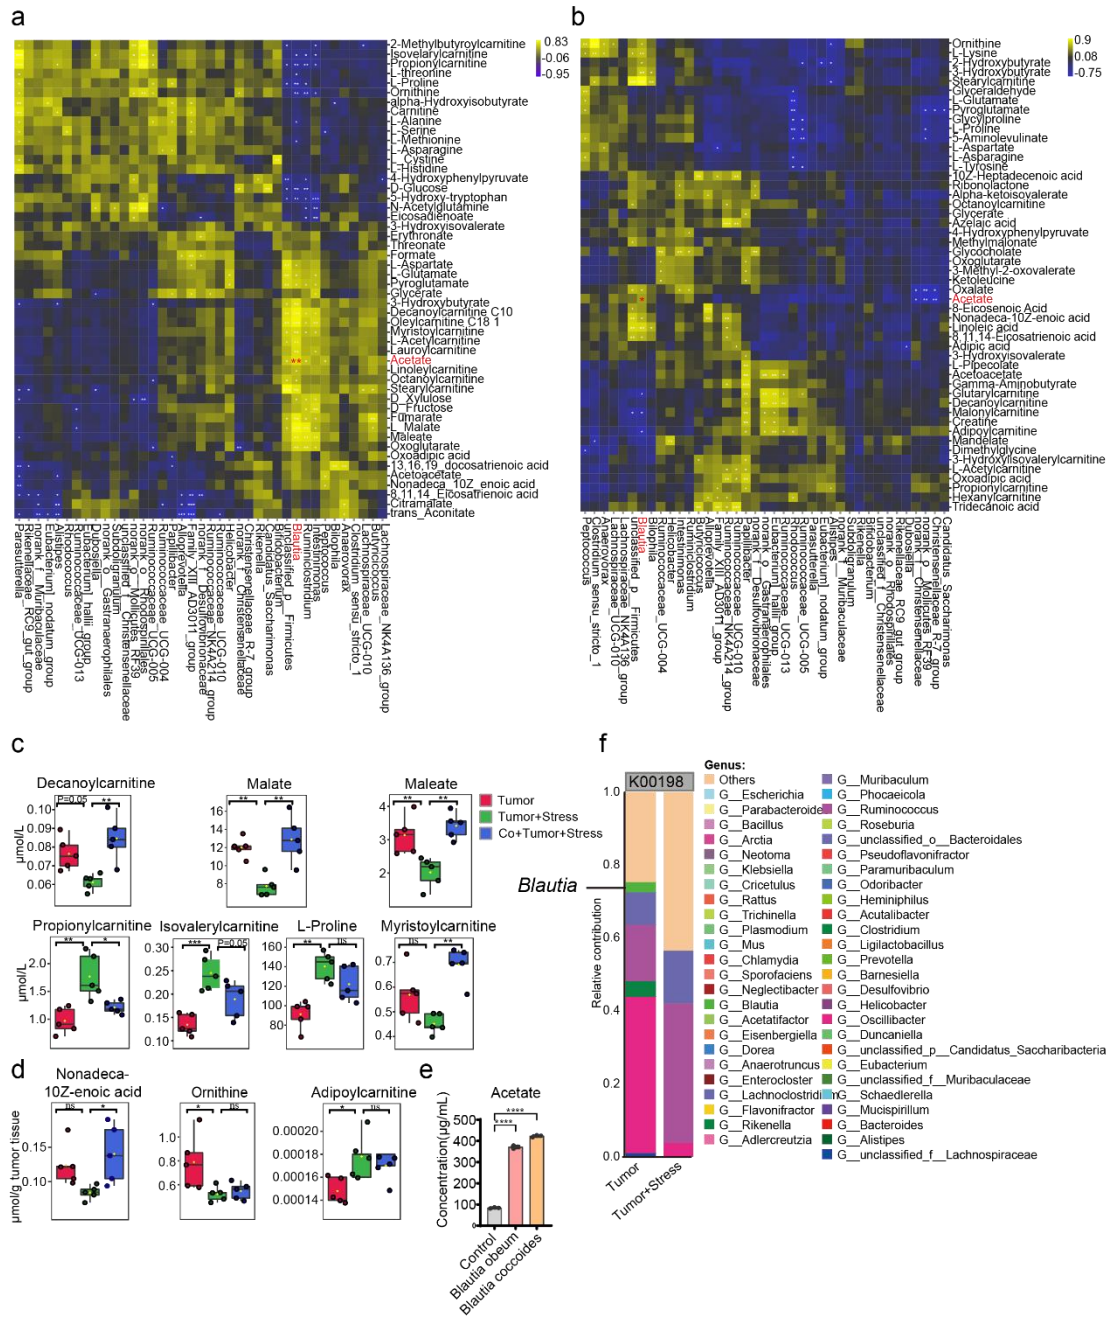

**Supplementary Fig. 4. Altered profiles of endogenous metabolites and their correlations with microbial genus abundances.** (a) Spearman correlation analysis between microbial genus abundances and serum metabolites ( $n=5$  per group). Each spot in the heatmap represents the Spearman correlation coefficient ( $R$  value) between microbial abundance and the concentration of a specific serum metabolite. The color of each spot indicates the strength and direction of the correlation: yellow color

indicates significant positive correlation ( $R > 0.3$ ,  $*p < 0.05$ ;  $**p < 0.01$ ;  $***p < 0.001$ ), whereas blue spot indicates significant negative correlation ( $R < -0.3$  and  $*p < 0.05$ ;  $**p < 0.01$ ;  $***p < 0.001$ ). (b) Spearman correlation analysis between microbial genus abundances and tumor metabolites. The heatmap shows the R values of the Spearman correlation analysis between the abundance of microbial genera and the concentration of tumor metabolites. The color scheme follows the same interpretation as described for panel (a). Concentration of significant changes of other metabolites in the (c) serum and (d) tumor tissue (n=5 per group). The boxplot displays the distribution of concentrations for each metabolite, with the box representing the interquartile range (10th to 90th percentiles), the center line representing the median, and the whiskers representing the minimum and maximum values. (e) The concentration of acetate in the culture medium of *Blautia coccooides* and *Blautia obeum* (n=3 per group). (f) Barplot of species and functional contribution analysis, highlighting the top 50 genus contributing the K00198. Data were presented as mean  $\pm$  SEM. Statistical significance was determined by the one-way ANOVA followed by the Holm-Sidak test for panels (c) and (d).  $*p < 0.05$ ,  $**p < 0.01$ ,  $***p < 0.001$ ,  $****p < 0.0001$ ; “ns” means no significant difference. Source data and exact  $p$  values are provided in the Source data file.

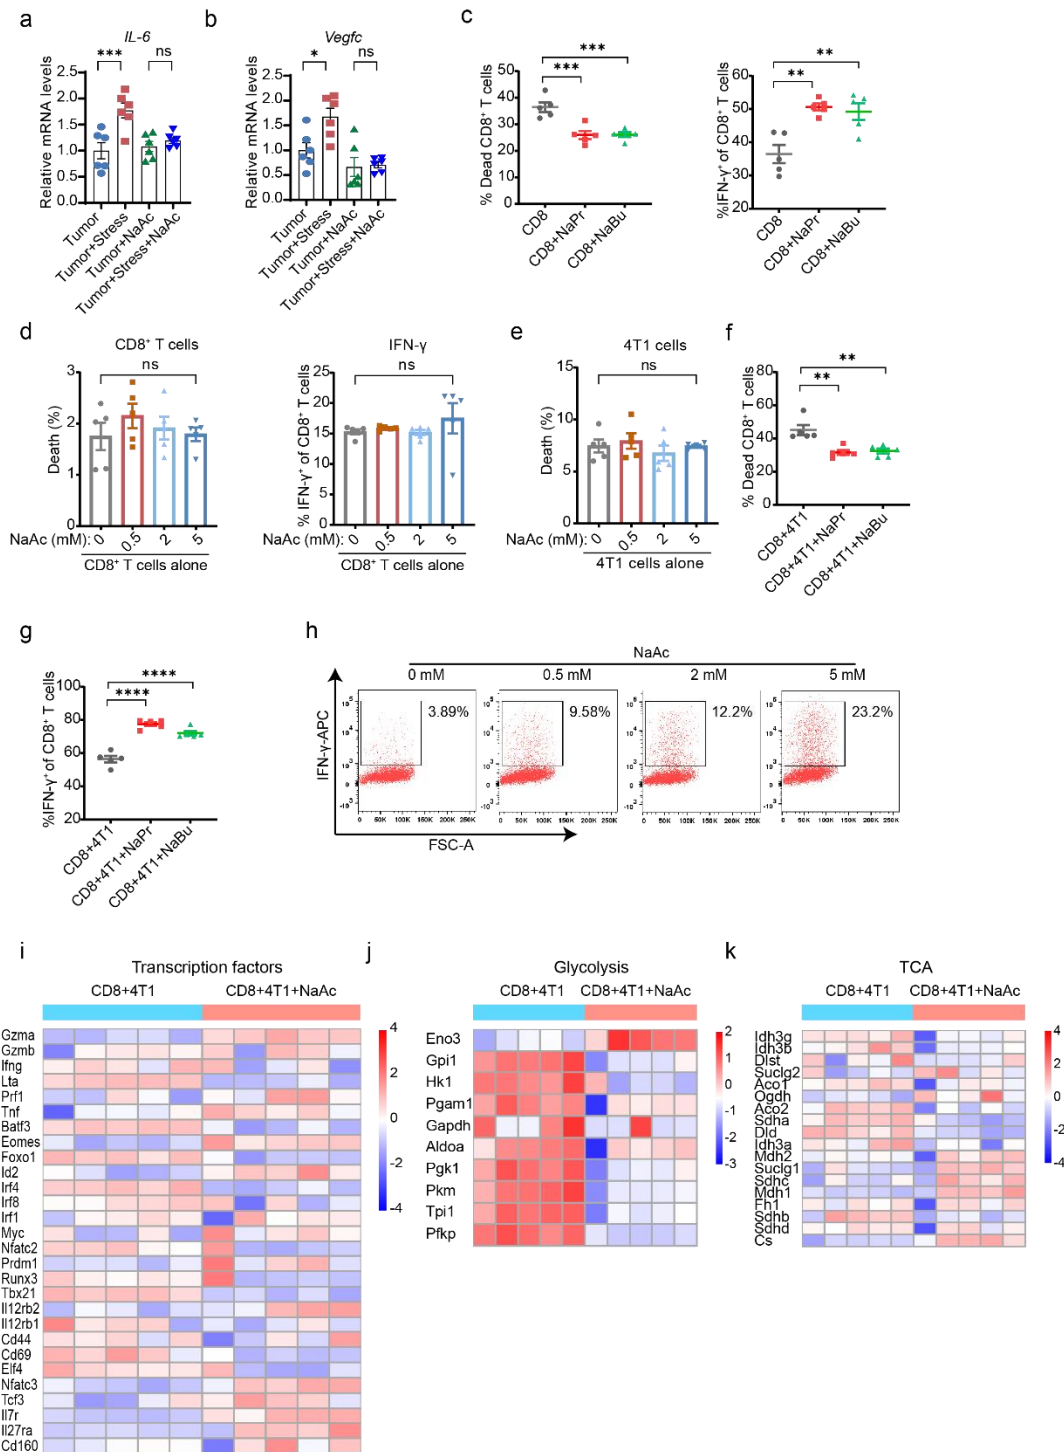

**Supplementary Fig. 5. The effects of sodium acetate (NaAc), sodium propionate (NaPr) and sodium butyrate (NaBu) on the CD8<sup>+</sup> T cells.** (a) Expression level of *IL-6* in the tumor tissue of different treatment groups (n=6 per group). (b) Expression level of *Vegfc* in the tumor tissue of different treatment groups (n=6 per group). (c) Percentage of CD8<sup>+</sup> T cell death after NaPr and NaBu treatment and IFN- $\gamma$  abundance of CD8<sup>+</sup> T cells (n=5 per group). (d) Percentage of CD8<sup>+</sup> T cell death after NaAc



treatment and IFN- $\gamma$  abundance of CD8<sup>+</sup> T cells (n=5 per group). (e) Percentage of 4T1 cancer cell death after NaAc treatment (n=5 per group). (f, g) Percentage of CD8<sup>+</sup> T cell death in co-culture with 4T1 cells after NaPr and NaBu treatment and IFN- $\gamma$  abundance of CD8<sup>+</sup> T cells (n=5 per group). (h) Representative flow plots showing IFN- $\gamma$  of CD8<sup>+</sup> T cells co-cultured with 4T1 cells in the presence or absence of NaAc treatment. Heatmaps for gene expression of transcription factors regulating CD8<sup>+</sup> T cell effector, memory and exhaustion (i), glycolysis (j) and TCA cycle (k) of control and acetate-exposed CD8<sup>+</sup> T cells during co-culture with 4T1 cells (n=5 per group). Data were presented as mean  $\pm$  SEM. Statistical significance was determined by one-way ANOVA followed by Tukey's multiple comparisons test. \* $p < 0.05$ ; \*\* $p < 0.01$ ; \*\*\* $p < 0.001$ ; \*\*\*\* $p < 0.0001$ . ns means no significant difference. Source data and exact  $p$  values are provided in the Source data file.

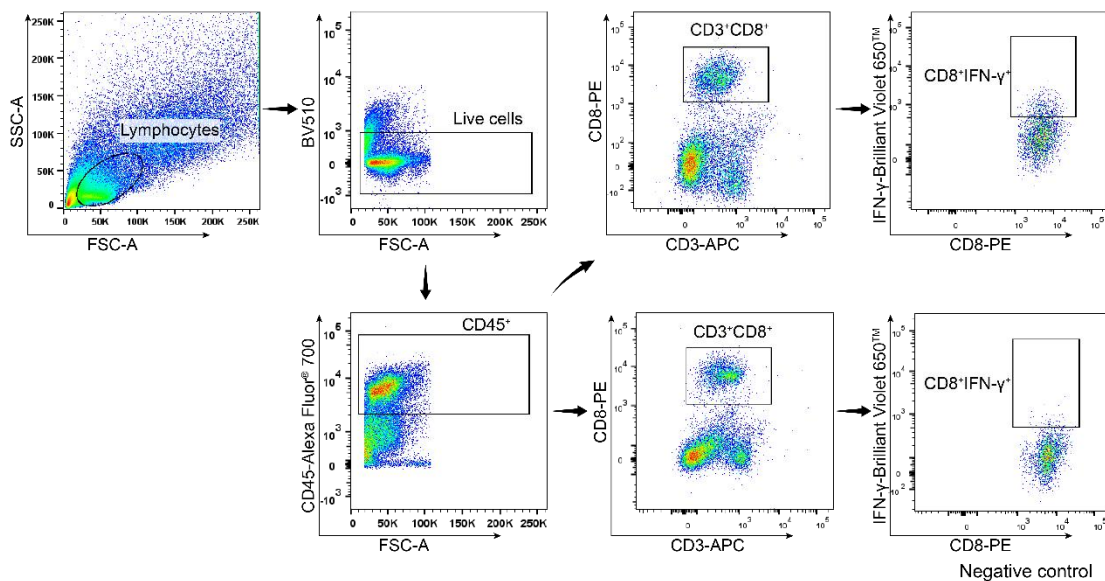

**Supplementary Fig. 6. Gating strategy for the detection of IFN- $\gamma$  of CD8<sup>+</sup> T cells in the tumor tissue by flow cytometry.**

**Supplementary Table 1. The primer sequences used for PCR reaction.**

| Gene name                 | Forward primer (5'-3')   | Reverse primer (5'-3')    |
|---------------------------|--------------------------|---------------------------|
| <i>IL-6</i>               | CAACGATGATGCACTTGCAGA    | TGTGACTCCAGCTTATCTCTTGG   |
| <i>Tnfa</i>               | CTCAGCGAGGACAGCAAGG      | AGGGACAGAACCTGCCTGG       |
| <i>Vegfa</i>              | AATGCTTTCTCCGCTCTGAA     | GCTTCCTACAGCACAGCAGA      |
| <i>Vegfc</i>              | GAGGTCAAGGCTTTTGAAGGC    | CTGTCCTGGTATTGAGGGTGG     |
| <i>IFN-γ</i>              | GTTACTGCCACGGCACAGTCATTG | ACCATCCTTTTGCCAGTTCCTCCAG |
| <i>Gapdh</i>              | TGAAGCAGGCATCTGAGGG      | CGAAGGTGGAAGAGTGGGAG      |
| <i>Blautia coccooides</i> | CGGTACCTGACTAAGAAGC      | AGTTTCATTCTTGCGAACG       |
| <i>Blautia obeum</i>      | TGGGTGTAAAGGGAGCGTAG     | CTTTCGAGCCTCAACGTCAG      |
| <i>16S rRNA</i>           | ACTCCTACGGGAGGCAGCAG     | ATTACCGCGGCTGCTGG         |
| <i>Acly</i>               | ACCCTTTCACTGGGGATCACA    | GACAGGGATCAGGATTTCCCTTG   |
| <i>Acss1</i>              | GTTTGGGACACTCCTTACCATAC  | AGGCAGTTGACAGACACATTC     |
| <i>Acss2</i>              | GTGAAAGGATCTTGGATTCCAGT  | CAGATGTTTGACCACAATGCAG    |
| <i>Slc16a1</i>            | GGCAGCCGTCCAGTAATGAT     | TGAAAGCAAGCCCAAGACCT      |
| <i>Slc16a3</i>            | GGCGGTAACAGGTGAAAGCA     | GCGTAGGAGAAACCCGTGAT      |
| <i>18S rRNA</i>           | CGGCGACGACCCATTTCGAAC    | GAATCGAACCCCTGATTCCCCGT   |

**Supplementary Table 2.**

| Reagent                               | Source    | Dilution | Identifier                                     |
|---------------------------------------|-----------|----------|------------------------------------------------|
| <b>Antibodies</b>                     |           |          |                                                |
| Trustain FCX™-anti-mouse CD16/32      | BioLegend | 1/200    | Clone: 93; Cat#101319; RRID: AB_1574973        |
| Brilliant Violet 510™-anti-mouse CD3  | BioLegend | 1/100    | Clone: 17A2; Cat#100233; RRID: AB_2561387      |
| APC anti-mouse CD3                    | BioLegend | 1/100    | Clone: 17A2; Cat#100235; RRID: AB_2561455      |
| Brilliant Violet 421™ anti-mouse CD3ε | BioLegend | 1/100    | Clone: 145-2C11; Cat#100335; RRID: AB_10898314 |
| FITC anti-mouse CD3                   | BioLegend | 1/100    | Clone: 17A2; Cat#100203; RRID: AB_312660       |
| Alexa Fluor® 700-anti-mouse CD45      | BioLegend | 1/200    | Clone: 30-F11; Cat#103127; RRID: AB_493714     |
| FITC-anti-mouse CD4                   | BioLegend | 1/200    | Clone: GK1.5; Cat#100405; RRID: AB_312690      |

|                                                              |                   |        |                                                  |
|--------------------------------------------------------------|-------------------|--------|--------------------------------------------------|
| PerCP-cyanine5.5-anti-mouse CD8a                             | BioLegend         | 1/250  | Clone: 53-6.7; Cat#100733; RRID: AB_2075239      |
| PE-anti-mouse CD8a                                           | BioLegend         | 1/250  | Clone: 53-6.7; Cat#100707; RRID: AB_312746       |
| FITC anti-mouse CD8a                                         | BioLegend         | 1/250  | Clone: 53-6.7; Cat#100706; RRID: AB_312745       |
| FITC-anti-mouse CD19                                         | BioLegend         | 1/200  | Clone: 6D5; Cat#115505; RRID: AB_313640          |
| APC-anti-mouse CD11b                                         | BioLegend         | 1/100  | Clone: M1/70; Cat#101211; RRID: AB_312794        |
| PerCp/Cyanine5.5 anti-mouse/human CD11b                      | BioLegend         | 1/100  | Clone: M1/70; Cat#101227; RRID: AB_893233        |
| PE-Cyanine <sup>7</sup> -anti-mouse CD11c                    | BioLegend         | 1/100  | Clone: N418; Cat#117317; RRID: AB_493569         |
| Brilliant Violet 421 <sup>TM</sup> -anti-mouse I-A/I-E       | BioLegend         | 1/100  | Clone M5/114.15.2; Cat# 107632; RRID: AB_2650896 |
| Brilliant Violet 605 <sup>TM</sup> -anti-mouse Ly-6C         | BioLegend         | 1/100  | Clone: HK1.4; Cat#128036; RRID: AB_2562353       |
| PerCP-cyanine5.5-anti-mouse Ly-6G                            | BioLegend         | 1/200  | Clone: 1A8; Cat#127615; RRID: AB_1877272         |
| PE-anti-mouse Ly-6G                                          | BioLegend         | 1/200  | Clone: 1A8; Cat#127607; RRID: AB_1186104         |
| APC-anti-mouse CD49b (Pan-NK)                                | BioLegend         | 1/500  | Clone: DX5; Cat#108909; RRID: AB_313416          |
| Brilliant Violet 650 <sup>TM</sup> -anti-mouse IFN- $\gamma$ | BioLegend         | 1/100  | Clone: XMG1.2; Cat#505832; RRID: AB_2734492      |
| APC-anti-mouse IFN- $\gamma$                                 | BioLegend         | 1/100  | Clone: XMG1.2; Cat#505810; RRID: AB_315404       |
| PE/Cyanine <sup>7</sup> -anti-mouse TNF- $\alpha$            | BioLegend         | 1/100  | Clone: MP6-XT22; Cat#506323; RRID: AB_2204356    |
| FITC-anti-mouse Granzyme B                                   | BioLegend         | 1/100  | Clone: GB11; Cat#515403; RRID: AB_2114575        |
| Anti-Mouse CD3 SAFIRE Purified                               | Peptotech/Biogems | 1/1000 | Clone: 17A2; Cat#05112-25-500                    |
| Anti-Mouse CD28 SAFIRE Purified                              | Peptotech/Biogems | 1/2000 | Clone: 37.51; Cat#10312-25-500                   |
| In Vivo Mab anti-mouse CD8 $\alpha$                          | BioXcell          | 1/6    | Clone: 2.43; Cat#BE0061                          |
| Anti-CD8 antibody                                            | ZSGB-Bio          | N/A    | Clone: SP16; Cat#ZA-0508                         |

#### Chemicals

|                                                        |            |                |
|--------------------------------------------------------|------------|----------------|
| Annexin V-FITC/PI KIT                                  | ES Science | Cat# AP001-100 |
| 7-AAD Viability Staining Solution                      | BioLegend  | Cat#420403     |
| Zombie Aqua <sup>TM</sup> Fixable Viability Kit (DMSO) | BioLegend  | Cat#423101     |
| Fixation Buffer                                        | BioLegend  | Cat#420801     |
| Perm Buffer Set                                        | BioLegend  | Cat#421403     |
| Intracellular Staining Permeabilization Wash Buffer    | BioLegend  | Cat#421002     |
| Brefeldin A Solution                                   | BioLegend  | Cat#420601     |

---

|                                                                    |               |                 |
|--------------------------------------------------------------------|---------------|-----------------|
| Cell Activation Cocktail (without Brefeldin A)                     | BioLegend     | Cat#423301      |
| Bouin's Fixative Solution                                          | Phygene       | Cat#PH0976      |
| Mouse IL-6 ELISA Kit                                               | ExCell Bio    | Cat#EM004-96    |
| Mouse VEGF ELISA Kit                                               | ExCell Bio    | Cat#EM009-96    |
| Mouse IFN- $\gamma$ ELISA Kit                                      | R&D Systems   | Cat#MIF00       |
| Mouse acetyl-CoA ELISA Kit                                         | CUSABIO       | Cat#CSB-E12936m |
| Transcription Factor Buffer Set 100 Tst                            | BD Pharmingen | Cat#562574      |
| Easy Sep <sup>TM</sup> Mouse CD8 <sup>+</sup> T cell isolation Kit | Stemcell      | Cat#19853       |
| Easy Sep <sup>TM</sup> Buffer                                      | Stemcell      | Cat#20144       |
| Murine IL-2                                                        | Peptotech     | Cat#212-12-20   |
| Sodium acetate                                                     | Aladdin       | Cat#S118649     |
| Sodium propionate                                                  | Aladdin       | Cat#S100121     |
| Sodium butyrate                                                    | Sigma         | Cat#V900464     |
| Fetal Bovine Serum (FBS)                                           | Gibco         | Cat#10270-106   |
| RPMI 1640 Medium                                                   | Gibco         | Cat#11875085    |
| RPMI 1640 Medium, no glucose                                       | Gibco         | Cat#11879020    |
| Penicillin-Streptomycin                                            | Gibco         | Cat#15140-122   |
| Collagenase II                                                     | Sigma-Aldrich | Cat#C6885       |
| Collagenase IV                                                     | Sigma-Aldrich | Cat#C5138       |
| DNase I                                                            | Sigma-Aldrich | Cat#DN25        |
| Ampicillin sodium salt                                             | Aladdin       | Cat#A105483     |
| Neomycin sulfate                                                   | Aladdin       | Cat#N109017     |
| Metronidazole                                                      | Aladdin       | Cat#M109874     |
| Vancomycin                                                         | Aladdin       | Cat#V301569     |

---

Experimental Models: Cell Lines/Bacterial Strains

---

|                          |      |               |
|--------------------------|------|---------------|
| Murine breast cancer 4T1 | ATCC | Cat#CRL-2539  |
| E0771                    | ATCC | Cat#CRL-3461  |
| <i>Blautia coccoides</i> | DSMZ | Cat#DSM 26115 |
| <i>Blautia obeum</i>     | DSMZ | Cat#DSM 25238 |

---

---

Experimental Models: Organisms/Strains

---

|                                        |                     |     |
|----------------------------------------|---------------------|-----|
| Mouse: Female BALB/c mice (6-week-old) | Beijing Vital River | N/A |
|                                        | Laboratory Animal   |     |
|                                        | Technology          |     |

|                                         |                     |     |
|-----------------------------------------|---------------------|-----|
| Mouse: Female C57BL/6 mice (6-week-old) | Beijing Vital River | N/A |
|                                         | Laboratory Animal   |     |
|                                         | Technology          |     |

---

Software and Algorithms

---

|                   |                   |                                                                 |
|-------------------|-------------------|-----------------------------------------------------------------|
| GraphPad Prim 7.0 | GraphPad Software | <a href="https://www.graphpad.com">https://www.graphpad.com</a> |
|-------------------|-------------------|-----------------------------------------------------------------|

|                   |        |                                                             |
|-------------------|--------|-------------------------------------------------------------|
| FlowJo version 10 | FlowJo | <a href="https://www.flowjo.com">https://www.flowjo.com</a> |
|-------------------|--------|-------------------------------------------------------------|

---
